# Supplementary material for: A green, fluorescent probe employing erythrosine-B for tracing the accidental administration of levamisole in milk and plasma samples
Source: Royal Society of Chemistry journal article supplement (doi:10.1039/d4ay00878b), 2024-01-01
Supplement: d4ay00878b1.pdf [file d4ay00878b1.pdf]

**Figure 1S:** The twelve main principles of GAC.

**Figure 2S:** The pictograms obtained through greenness evaluation of the proposed method applying GAPI.
