# Supplementary figures and images for: A green, fluorescent probe employing erythrosine-B for tracing the accidental administration of levamisole in milk and plasma samples
Source: Royal Society of Chemistry journal article supplement (doi:10.1039/d4ay00878b), 2024-01-01

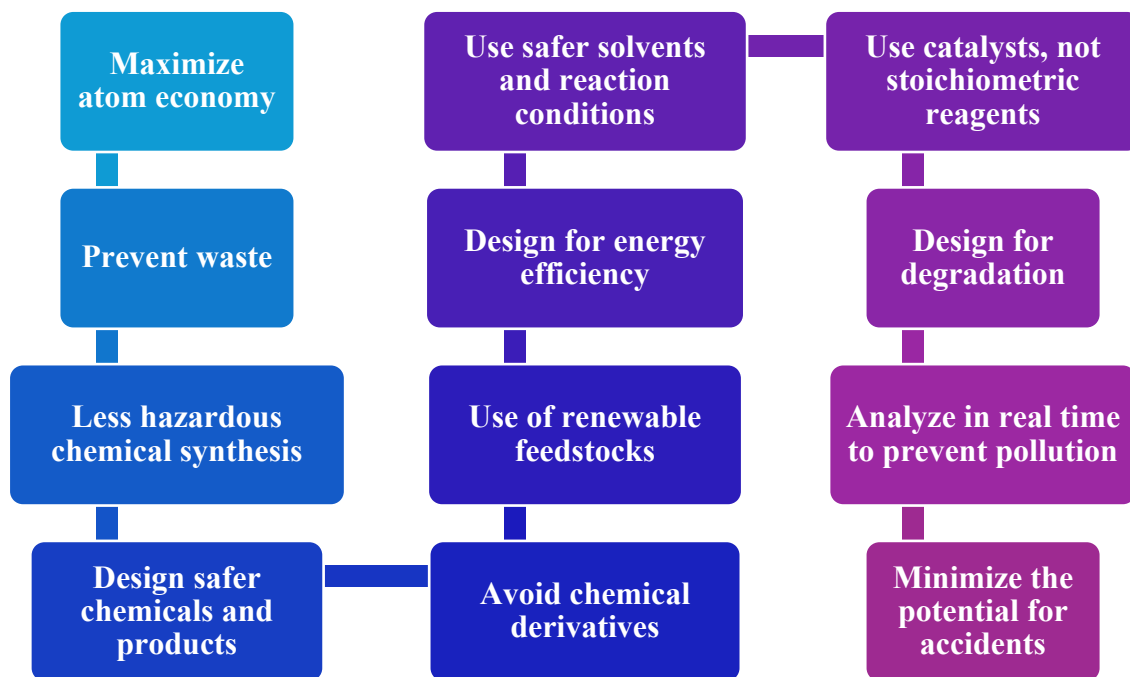

**Figure S1**

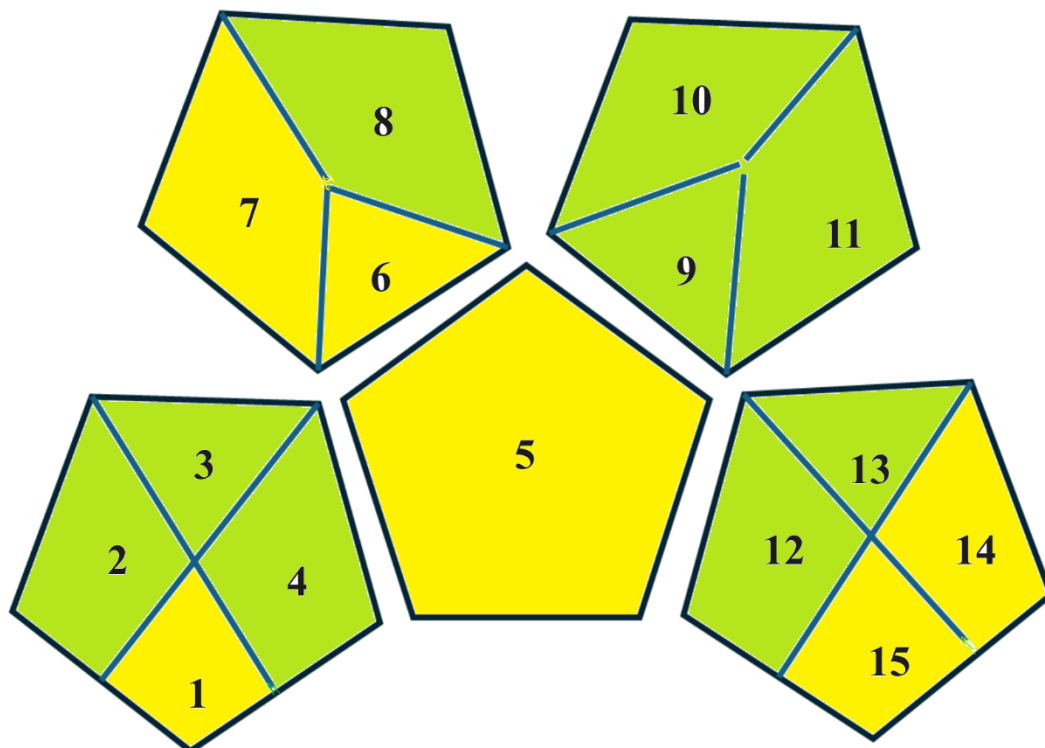

**Figure S2**

Supplement: d4ay00878b2.pdf [file d4ay00878b2.pdf]
